# Supplementary material for: Poly(Glycerol Succinate) as Coating Material for 1393 Bioactive Glass Porous Scaffolds for Tissue Engineering Applications
Source: MDPI journal article supplement (doi:10.3390/polym14225028), 2022-11-19

## Supplementary data

Figure S1. ALP activity in supernatants of hASCs cultured within the different scaffolds at days 3, 7 and 21 after seeding. Quantification of ALP activity is presented per experimental condition. Data shown as means, ANOVA 2-way test corrected using Tukey for multiple comparisons was used,  $p^* < 0.05$ ,  $p^{**} < 0.01$ ,  $p^{***} < 0.001$ ,  $p^{****} < 0.0001$

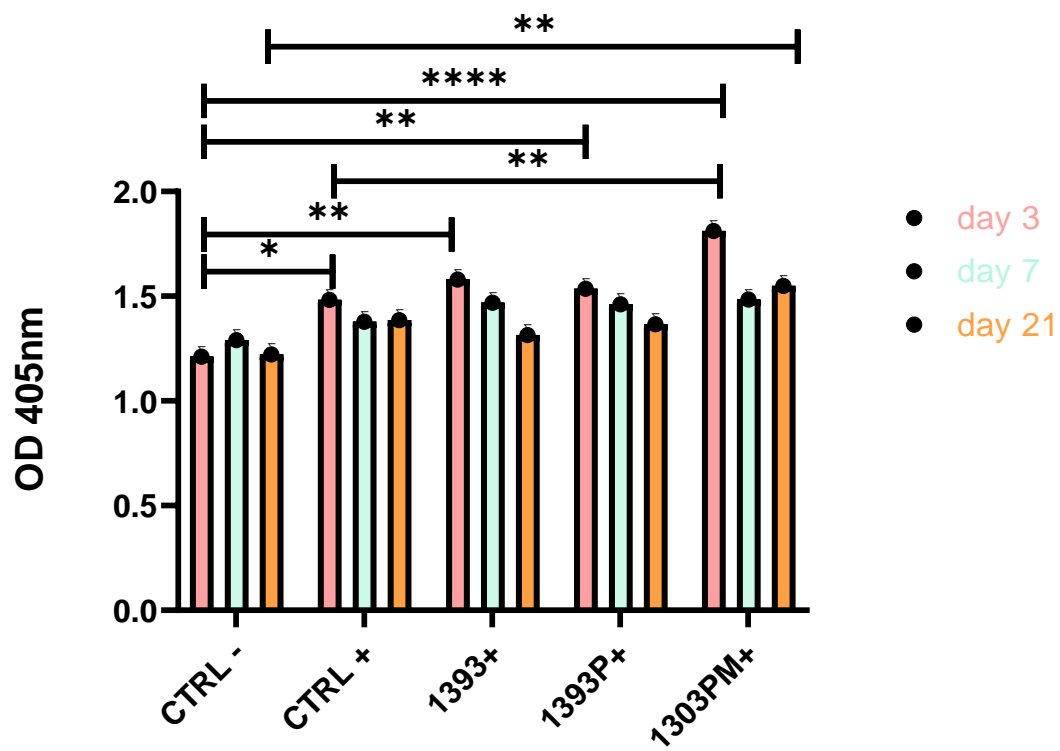

Supplement: s1 [file s1]
